# Supplementary material for: Late-life intermittent fasting decreases aging-related frailty and increases renal hydrogen sulfide production in a sexually dimorphic manner
Source: PubMed Central journal article supplement (PMC8492807; doi:10.1007/s11357-021-00330-4), 2021-03-06
Supplement: 11357_2021_330_MOESM13_ESM.pdf [file 11357_2021_330_MOESM13_ESM.pdf]

Supplemental Data Figures and their Legends for both review purposes and intended for publication as an online data supplement for the manuscript titled “**Late-life intermittent fasting decreases aging-related frailty and increases renal hydrogen sulfide production in a sexually dimorphic manner**” by Yoko O. Henderson, Nazmin Bithi, Christopher Link, Jie Yang, Rebecca Schugar, Natalia Llarena, J. Mark Brown, and Christopher Hine

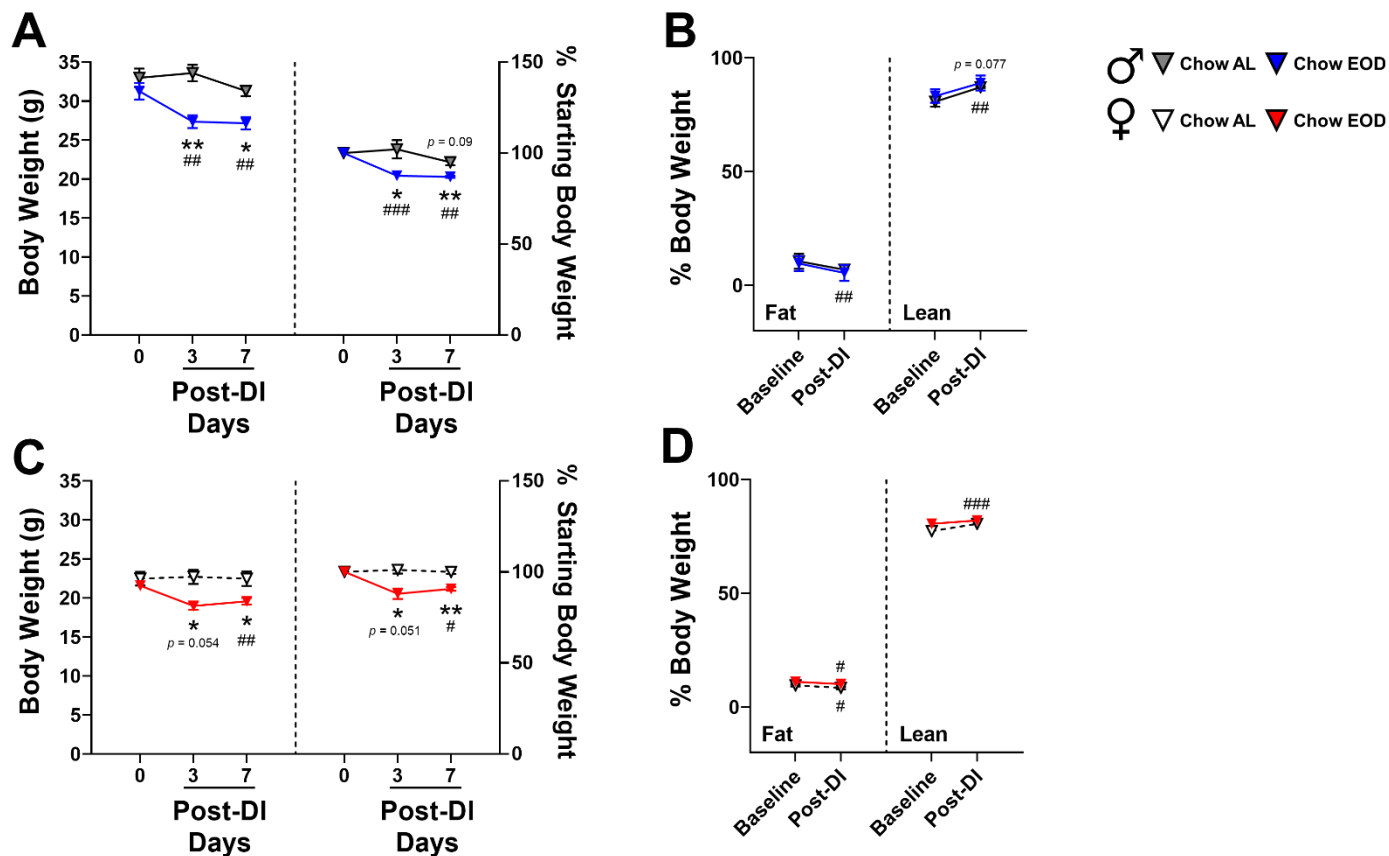

**Supplemental Figure 1: EOD fasting decreases body weight and alters body composition in a sexually dimorphic manner in young adult mice. (A-D)** Body mass and body composition in 6-month old male and female mice on Chow AL and Chow EOD feeding. Absolute body weight (*left*) and % body weight compared with baseline (*right*) in the male (**A**) and female (**C**) Chow AL and Chow EOD groups from baseline to post-dietary intervention (post-DI). (**B, D**) % fat mass adjusted to body weight (*left*) and % lean mass adjusted to body weight (*right*) in the male (**B**) and female (**D**) Chow AL and Chow EOD groups at baseline and post-DI. The figures depict the mean with error bars ( $\pm$  SEM) and  $n = 3$  mice/diet group per sex. The asterisks indicate the significant difference between the same-sex Chow AL and Chow EOD groups.  $*p < 0.05$ ,  $**p < 0.01$ ,  $***p < 0.001$ , and  $****p < 0.0001$ . The pound signs indicate the significant within group difference between the baseline and a post-DI time point.  $\#p < 0.05$ ,  $\##p < 0.01$ ,  $\###p < 0.001$ , and  $\####p < 0.0001$ . See also Figure 1.

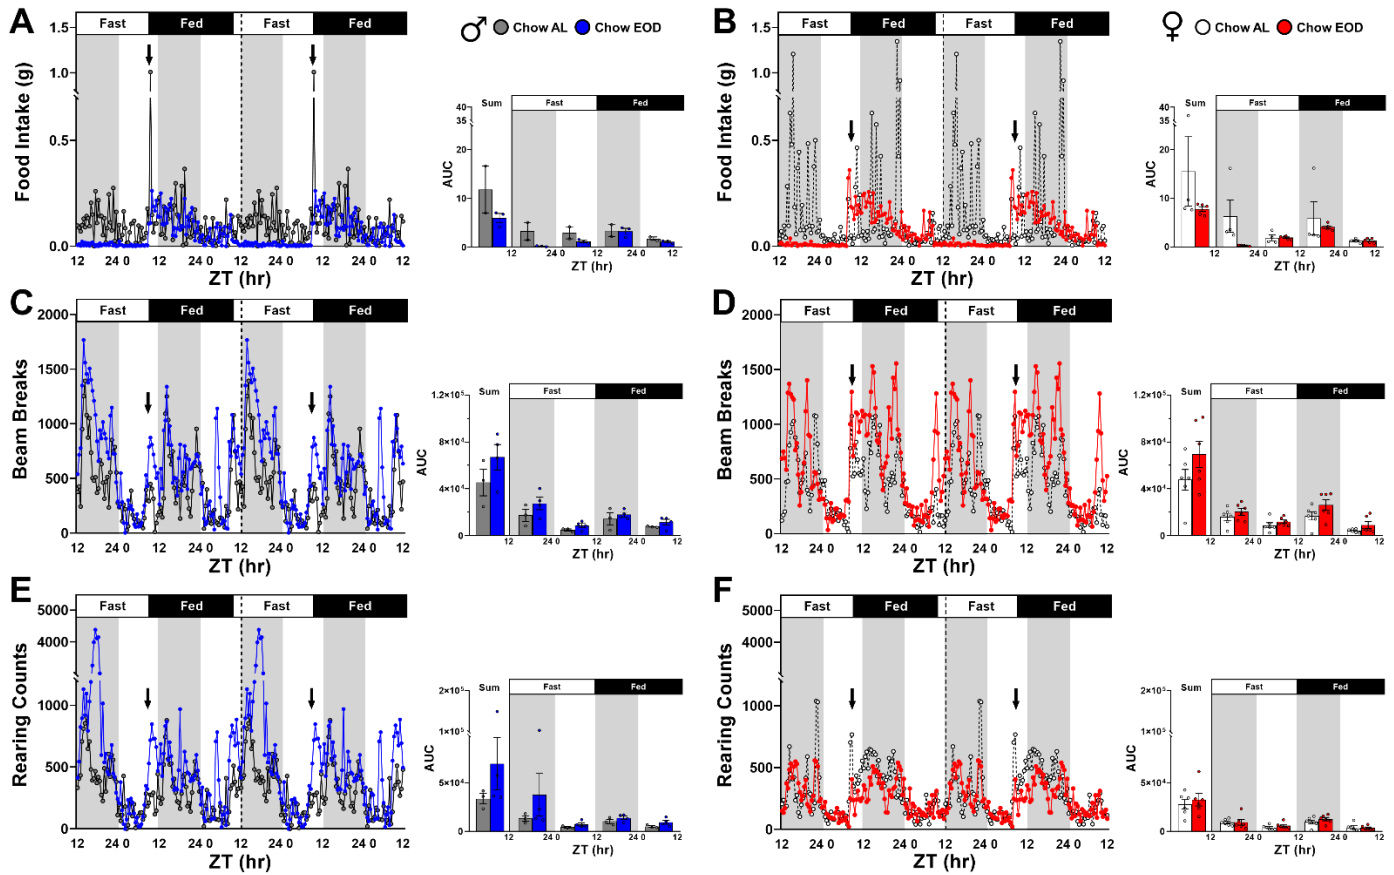

**Supplemental Figure 2: Late-life EOD fasting does not affect circadian patterns of food intake, ambulation, or rearing.** (A-F) Food intake (g) per mouse, beam breaks, and rearing counts over the 4-day period in the metabolic chamber were measured approximately every 20 min in the male (A, C, E) and female (B, D, F) Chow AL and Chow EOD groups ( $n = 3-6$  mice per sex per group). The figures (A-F) depict the mean with no error bars for a representation purpose, while the insets show the AUC for combined/summation of area, fast day 12:12 light:dark cycle, and fed day 12:12 light:dark cycle for each measure. The inset figures depict the mean with error bars ( $\pm$  SEM). See also Figure 2.

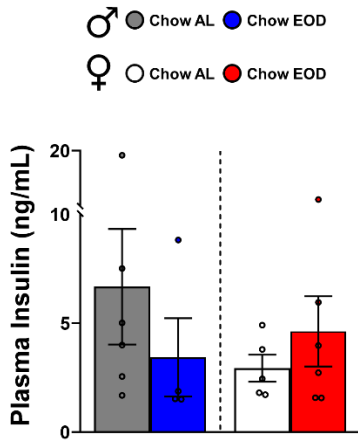

**Supplemental Figure 4: Late-life EOD fasting did not affect circulating insulin levels.** Plasma insulin levels (ng/mL) in the male (*left*) and female (*right*) Chow AL and Chow EOD groups (n = 4-6 mice per sex per group). The data depict the mean with error bars ( $\pm$  SEM). See also Figure 4.

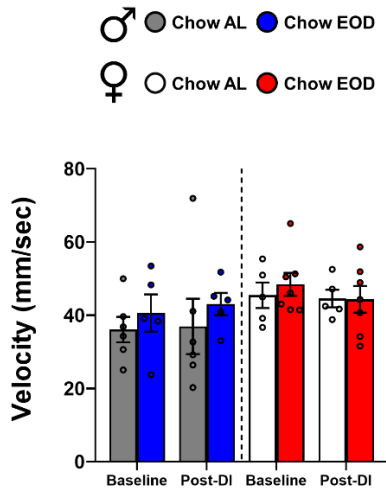

**Supplemental Figure 6: Late-life EOD fasting does not affect locomotion during the hippocampal-dependent short-term memory test.** Velocity in the Y Maze forced alternation task at baseline and post-DI in the male (*left*) and female (*left*) Chow AL and Chow EOD groups (n = 5-7 mice per sex per group). The figure depicts the mean with error bars ( $\pm$  SEM). See also Figure 6.

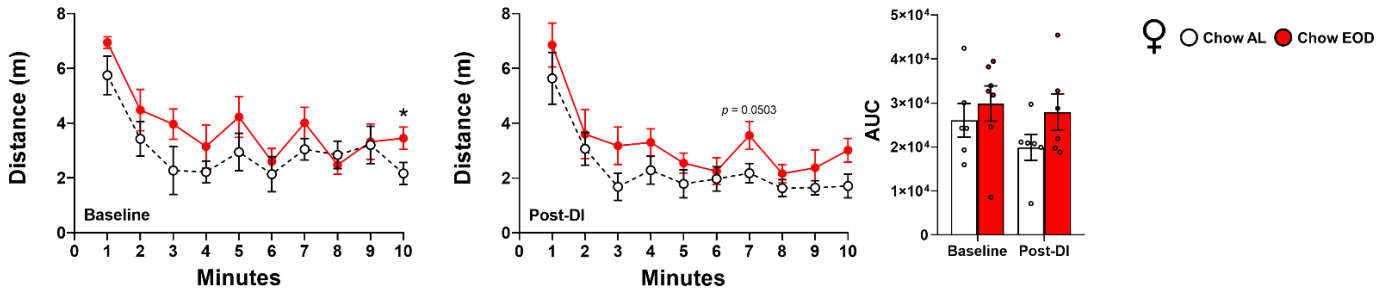

**Supplemental Figure 7: Late-life EOD fasting does not affect motor activity in females during the open field task.** Velocity in the open field at baseline and post-DI in the female Chow AL ( $n = 6$ ) and Chow EOD groups ( $n = 6$ ). The figure depicts the mean with error bars ( $\pm$  SEM). The asterisks indicate the significant difference between the same-sex Chow AL and Chow EOD groups.  $*p < 0.05$ . See also Figure 7.

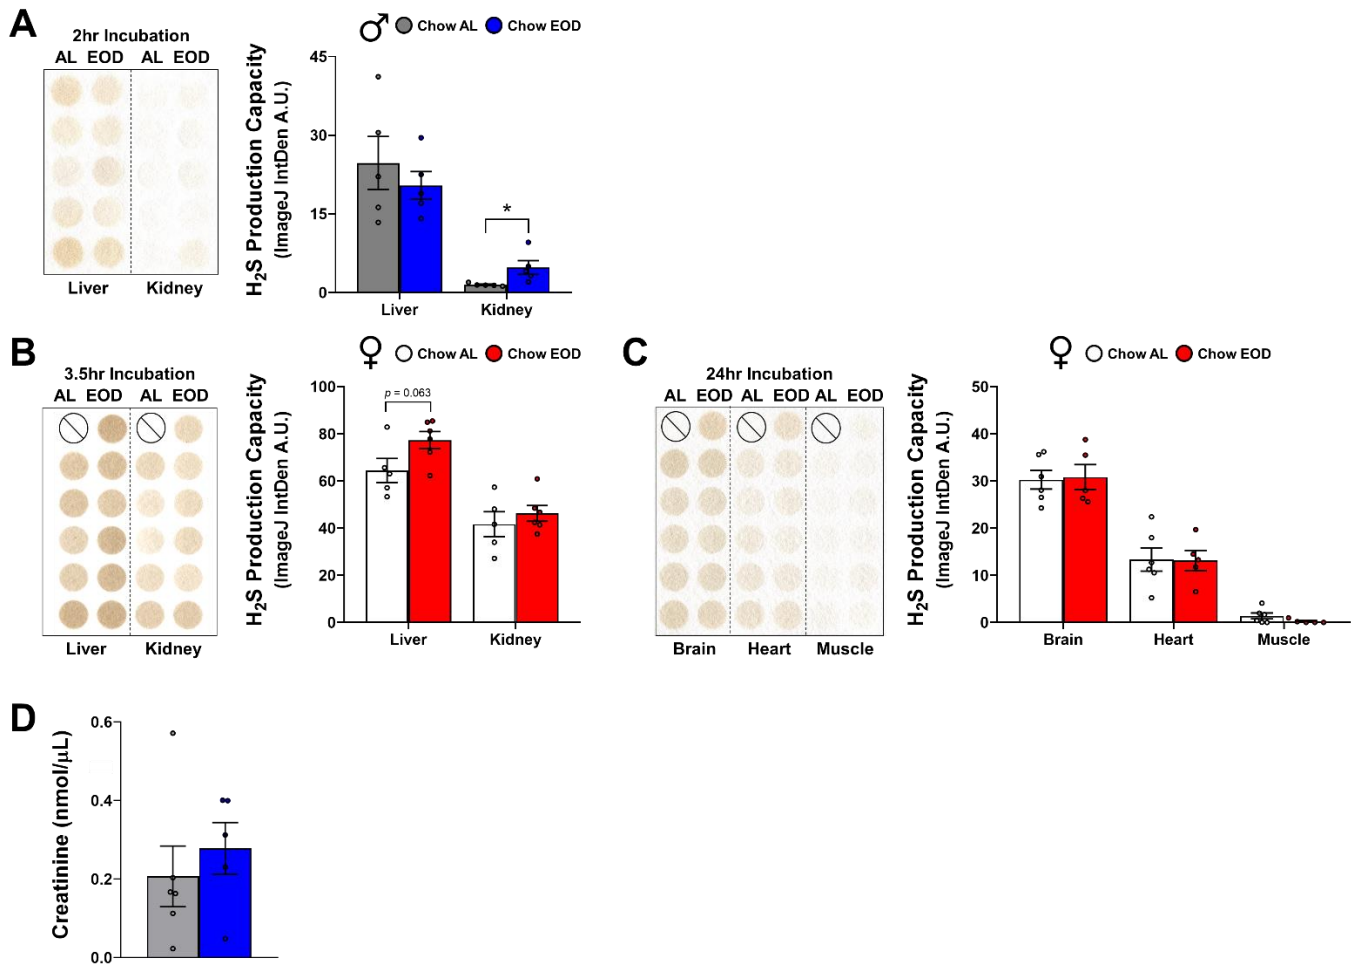

**Supplemental Figure 9: Renal H<sub>2</sub>S production capacity is enhanced by late-life EOD fasting in a sex-specific manner and without affecting circulating plasma creatinine levels.** (A) H<sub>2</sub>S production capacity in liver and kidney in the male Chow AL (n = 5) and Chow EOD groups (n = 5). Images with quantitated lead sulfide spots on the filter paper following a 2-hr incubation. (B, C). H<sub>2</sub>S production capacity in liver and kidney (B) and in brain, heart, and muscle (C) in the female Chow AL (n = 5) and Chow EOD groups (n = 6). Images with quantitated lead sulfide spots on the filter paper following a 3.5-hr incubation (B) and a 24-hr incubation (C). (D) Plasma creatinine levels in the male Chow AL (n = 6) and Chow EOD groups (n = 5). The figures (A-D) depict the mean with error bars (± SEM). The asterisks indicate the significant difference between the male Chow AL and Chow EOD groups. \**p* < 0.05. See also Figure 9.
